# Supplementary material for: External vibrations can destroy the specific capacitance of supercapacitors – from experimental proof to theoretical explanations
Source: Royal Society of Chemistry journal article supplement (doi:10.1039/d0ta11794c), 2021-01-01
Supplement: d0ta11794c1.pdf [file d0ta11794c1.pdf]

## Supporting Information

### **External vibrations can destroy the specific capacitance of supercapacitors – From experimental proof to theoretical explanations**

*Sudipta Biswas<sup>1</sup>, Vikas Sharma<sup>2</sup>, Trilok Singh<sup>3</sup> and Amreesh Chandra<sup>1\*</sup>*

<sup>1</sup>Department of Physics,

<sup>2</sup>School of Nanoscience and Technology,

<sup>3</sup> School of Energy Science and Technology

Indian Institute of Technology Kharagpur, Kharagpur-721302, India.

\*Corresponding Author: [achandra@phy.iitkgp.ac.in](mailto:achandra@phy.iitkgp.ac.in)

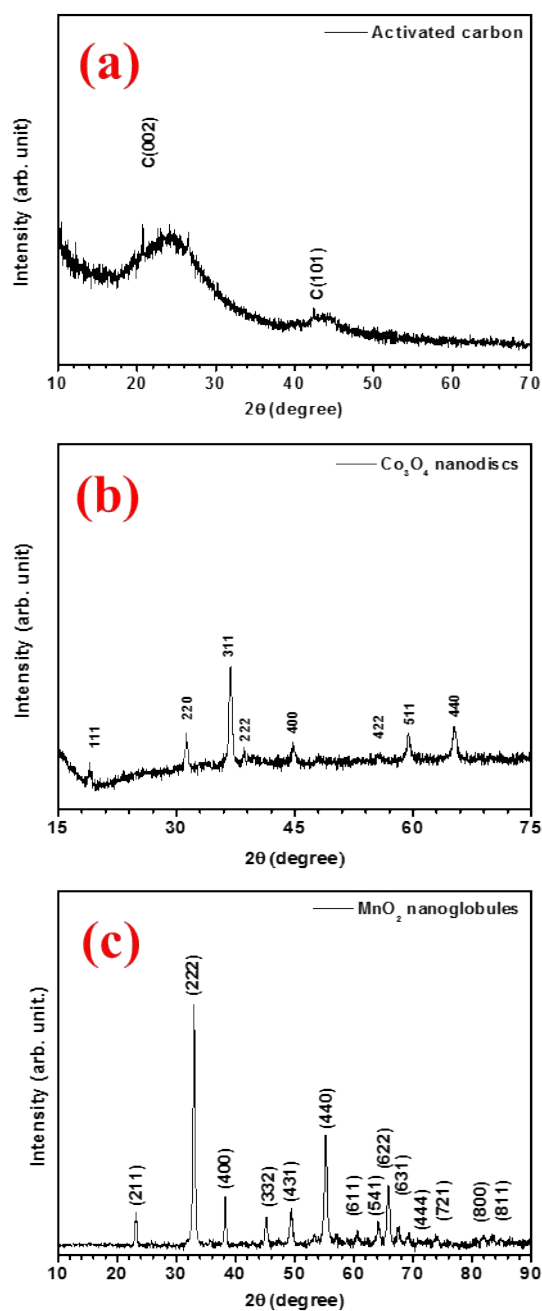

Fig. S1. XRD pattern for (a) activated carbon, (b)  $\text{Co}_3\text{O}_4$  nanodiscs and (c)  $\text{MnO}_2$  nanoglobules, respectively.

**XRD analysis of materials:** Activated carbon showed two graphitic peak 002 and 101.  $\text{Co}_3\text{O}_4$  showed crystalline peaks. All the peaks could be indexed using the JCDPS card no. 42-1467 associated with the space group  $\text{Fd}\bar{3}\text{m}$  (227). Here  $\alpha\text{-MnO}_2$  was synthesized which is indexed with JCPDS card no. 44-141.

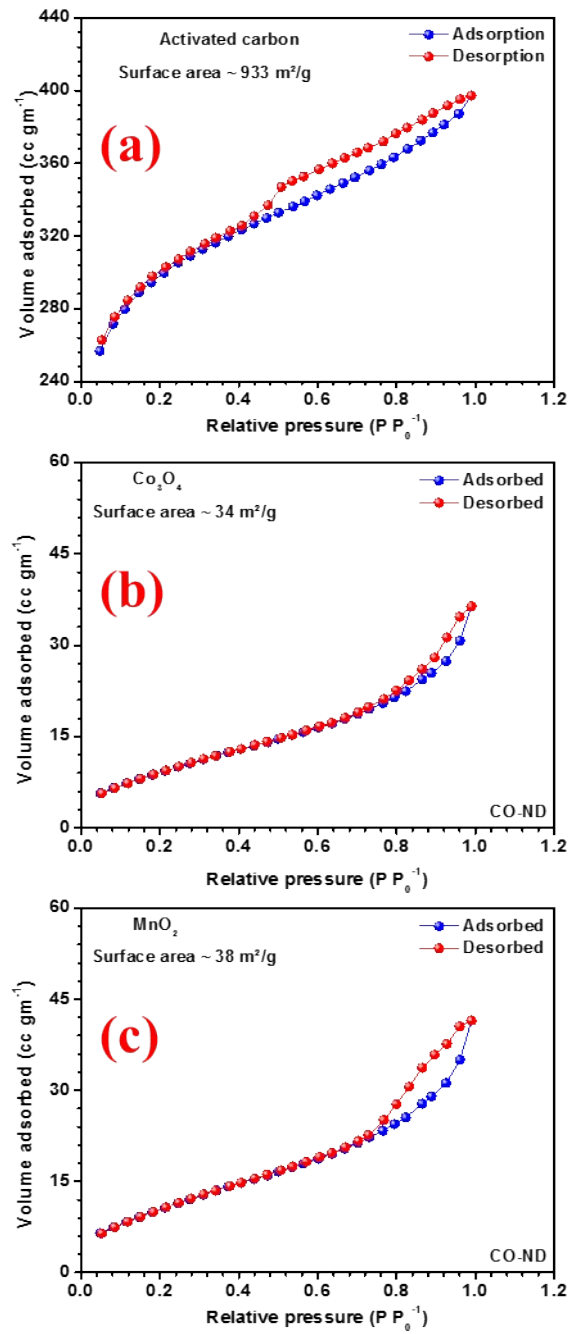

Fig. S2.  $N_2$  adsorption-desorption isotherms for (a) activated carbon, (b)  $Co_3O_4$  nanodiscs and (c)  $MnO_2$  globules, respectively.

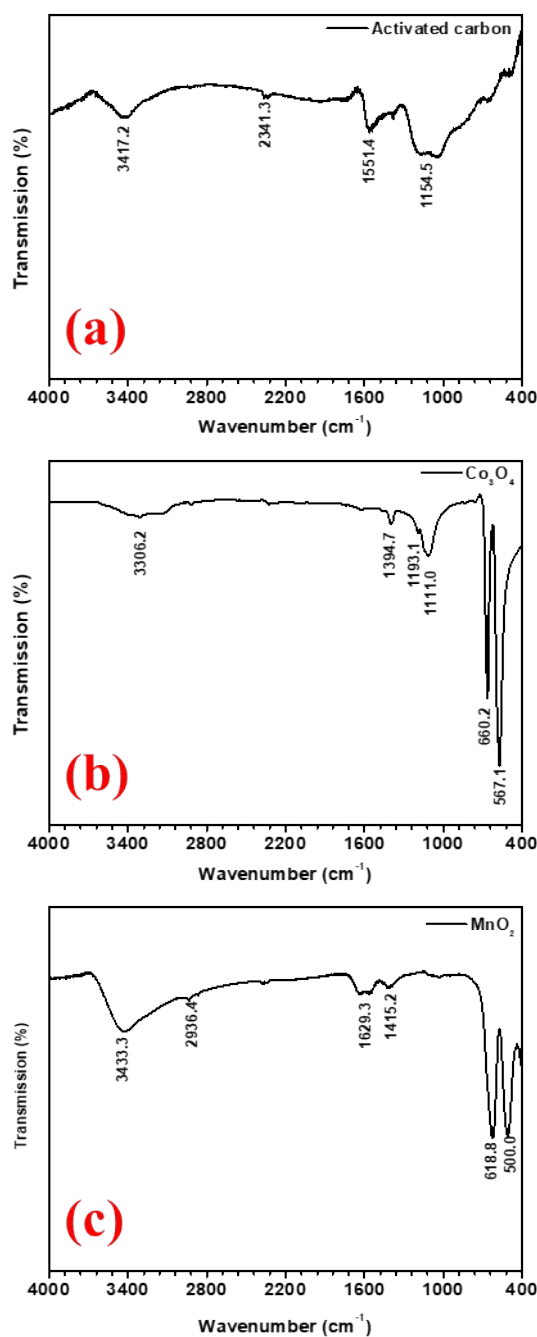

Fig. S3. FTIR spectrum for (a) activated carbon, (b)  $\text{Co}_3\text{O}_4$  nanodiscs and (c)  $\text{MnO}_2$  globules, respectively.

For activated carbon, the absorption band near 3417  $\text{cm}^{-1}$  is for the C-OH, 1551  $\text{cm}^{-1}$  for C=C, and near 1154.5 for C=O present in the sample. For  $\text{Co}_3\text{O}_4$  and  $\text{MnO}_2$ , the peaks appearing near 3306.2 and 3433.3  $\text{cm}^{-1}$  are for the moisture present in the sample. Absorption band near 600.2  $\text{cm}^{-1}$  and 567  $\text{cm}^{-1}$  in  $\text{Co}_3\text{O}_4$  is for Co-O bond and similarly in  $\text{MnO}_2$  absorption bands present near 618.8 and 500.0  $\text{cm}^{-1}$  are for the Mn-O bonds.

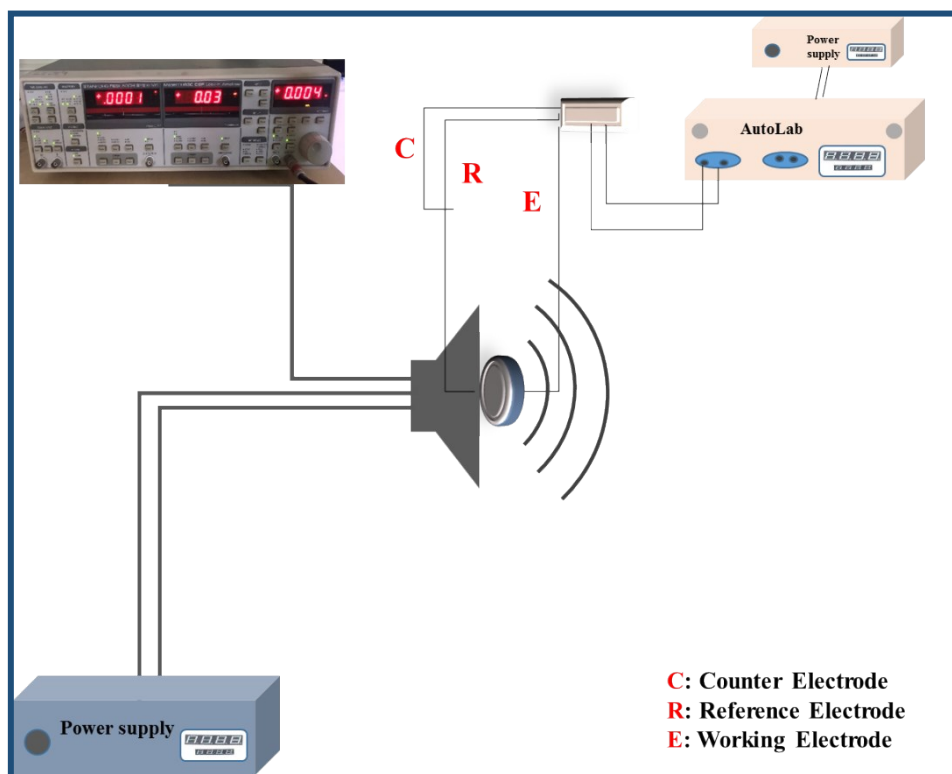

Fig. S4. Schematic of the setup for the measurement of specific capacitance under external frequency.

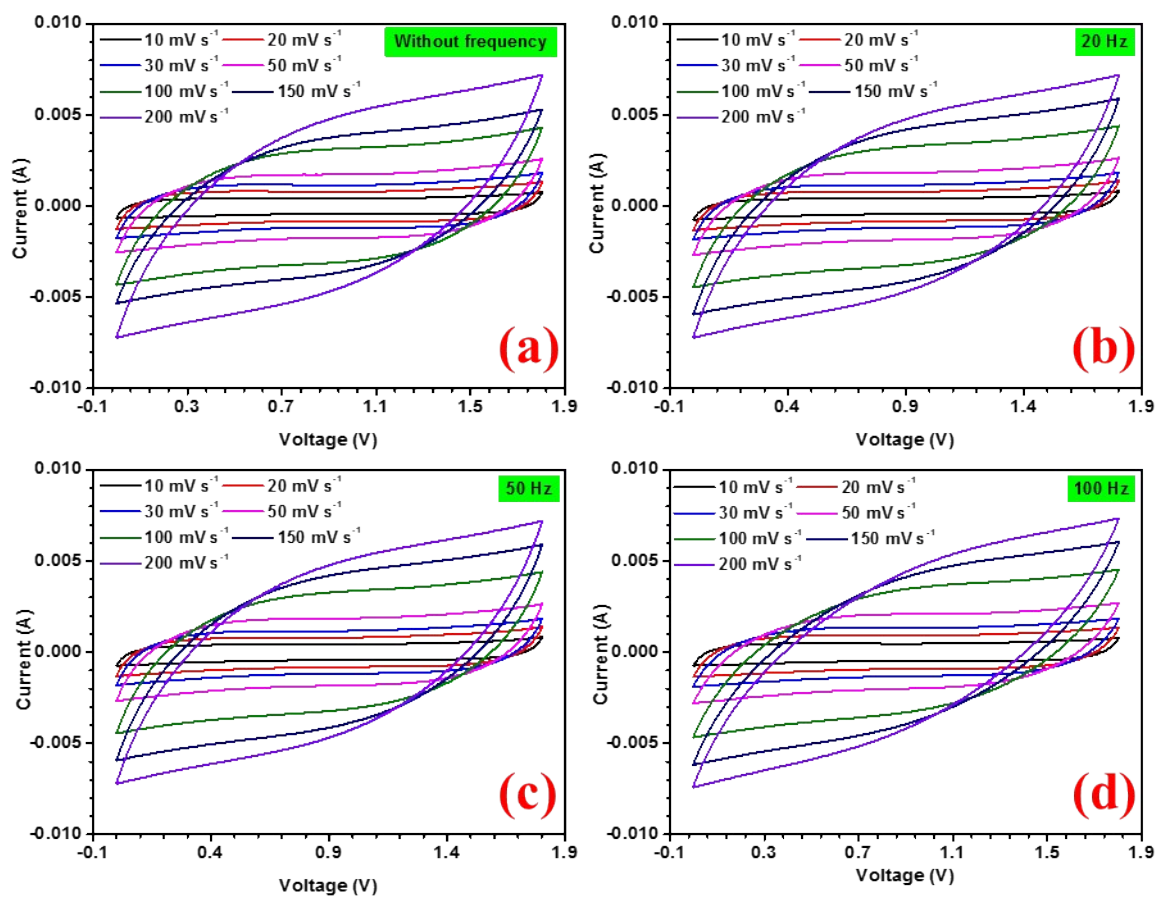

Fig. S5. CV profiles for activated carbon under applied external frequency.

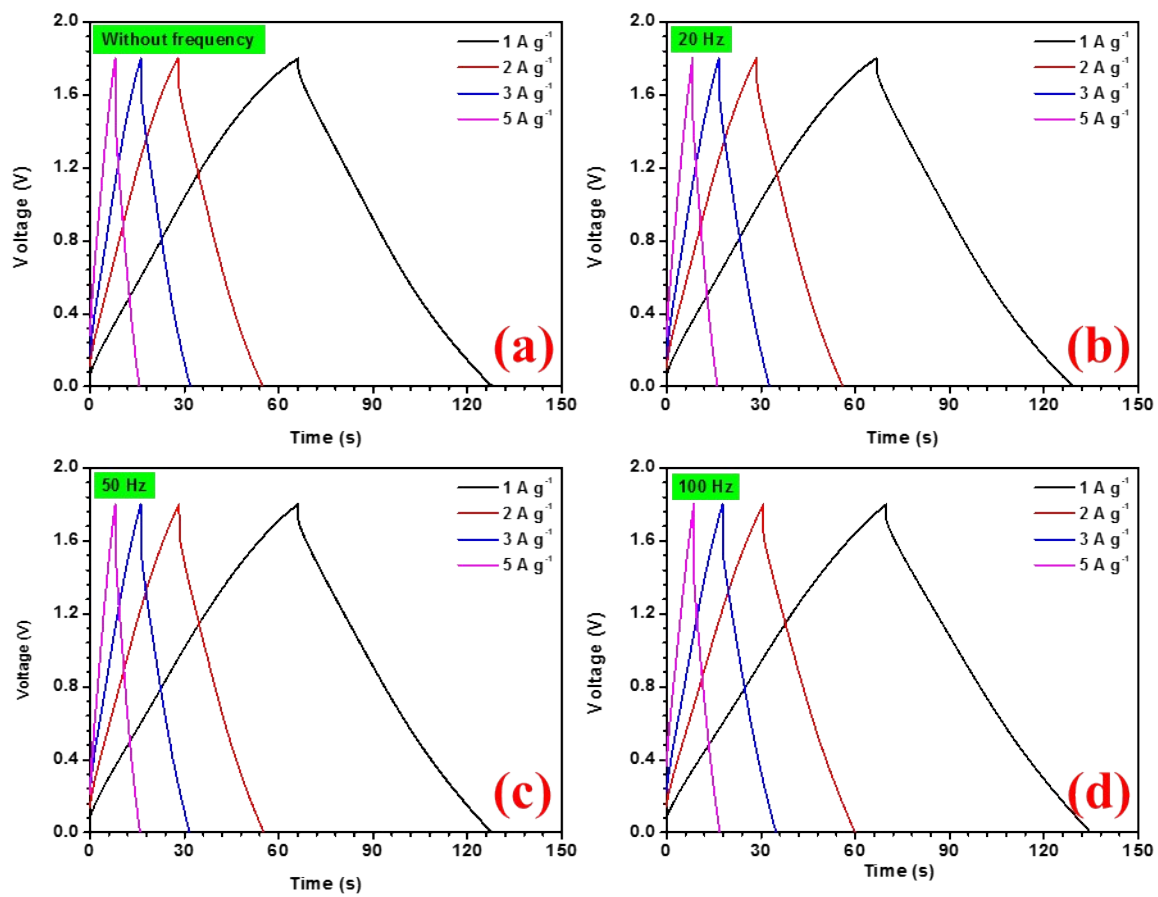

Fig. S6. CD profiles for activated carbon under different applied external frequency.

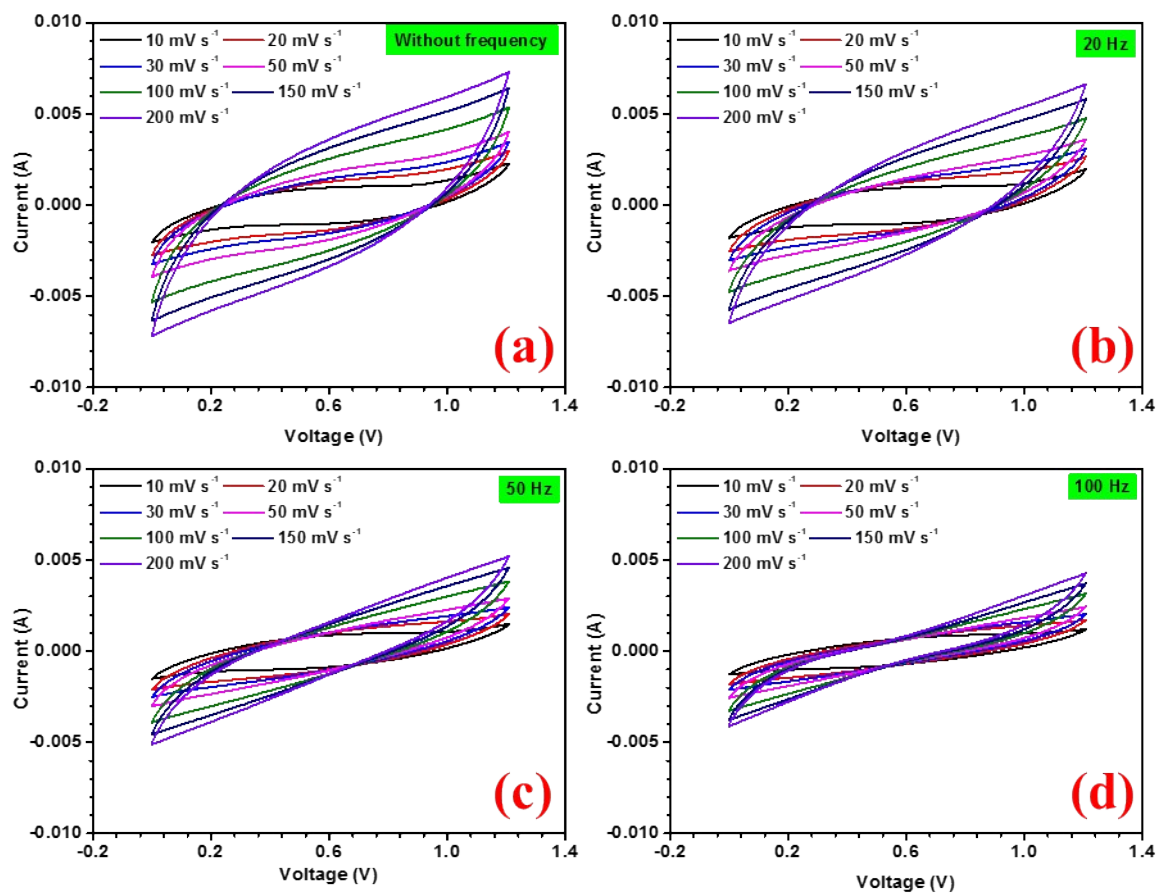

Fig. S7. CV profiles for  $\text{Co}_3\text{O}_4$  nanodiscs under applied external frequency.



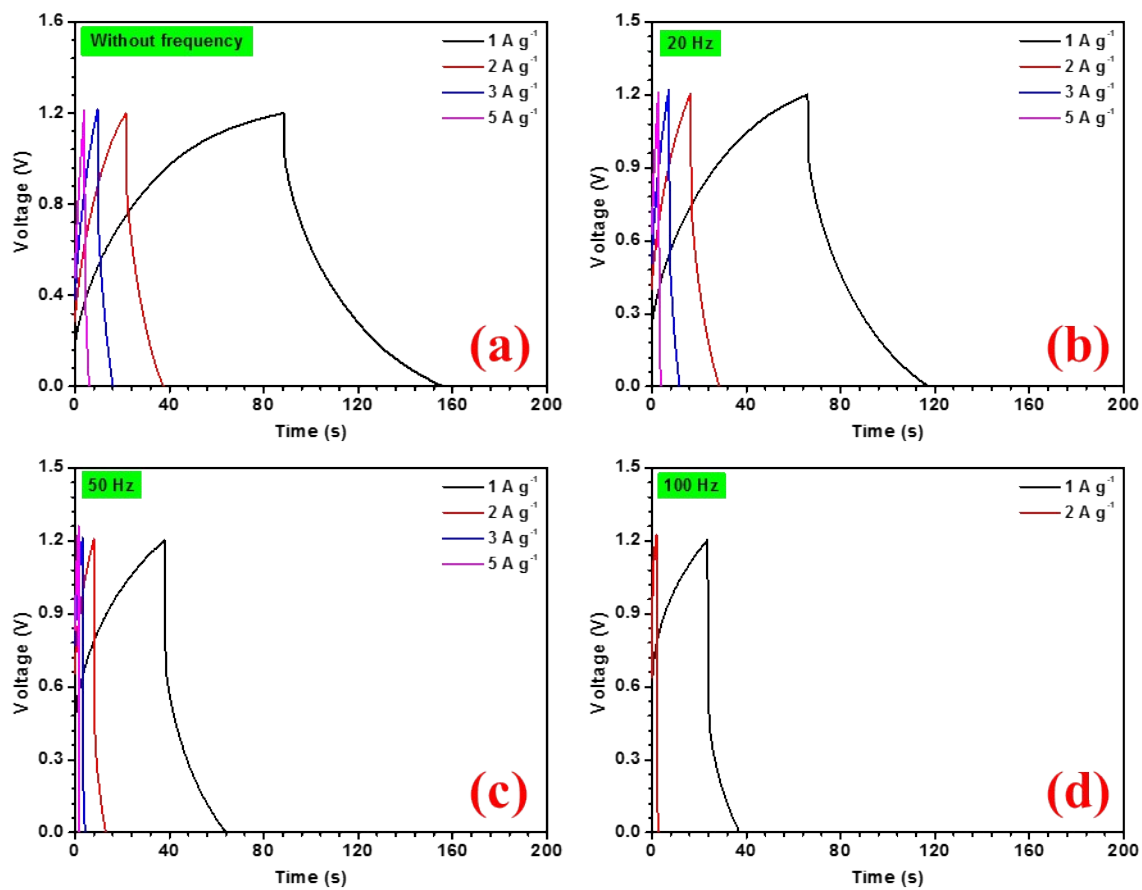

Fig. S8. CD profiles for  $\text{Co}_3\text{O}_4$  nanodiscs under applied external frequency.

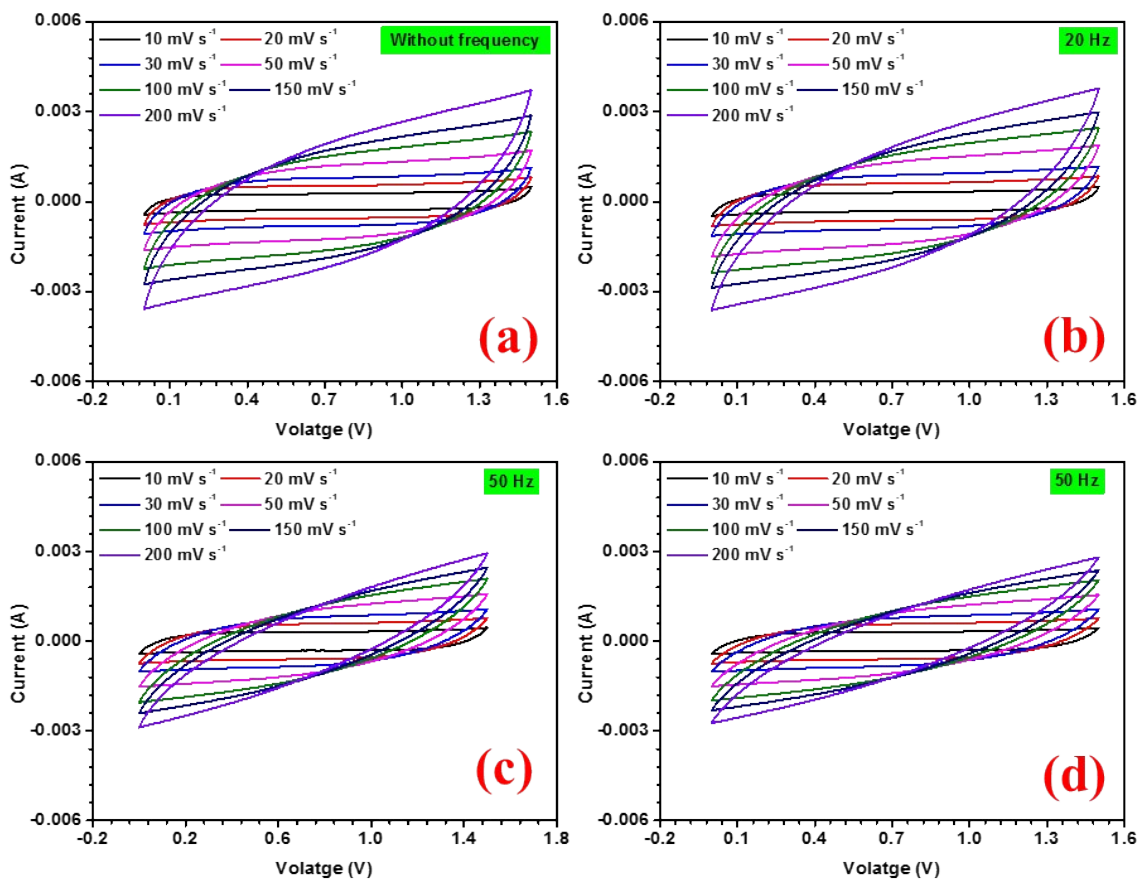

Fig. S9. CV profiles for MnO<sub>2</sub> nanoglobules under external frequency.

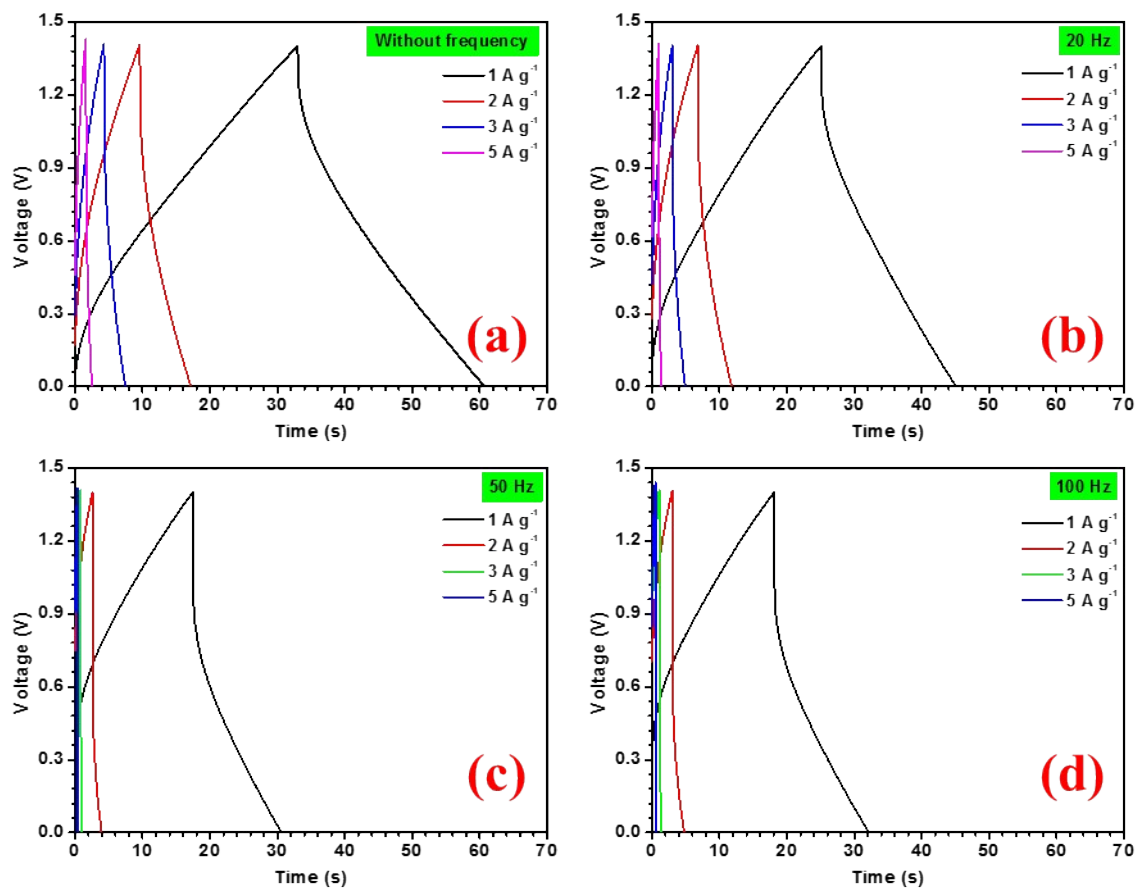

Fig. S10. CD profiles for MnO<sub>2</sub> nanoglobules under external frequency.

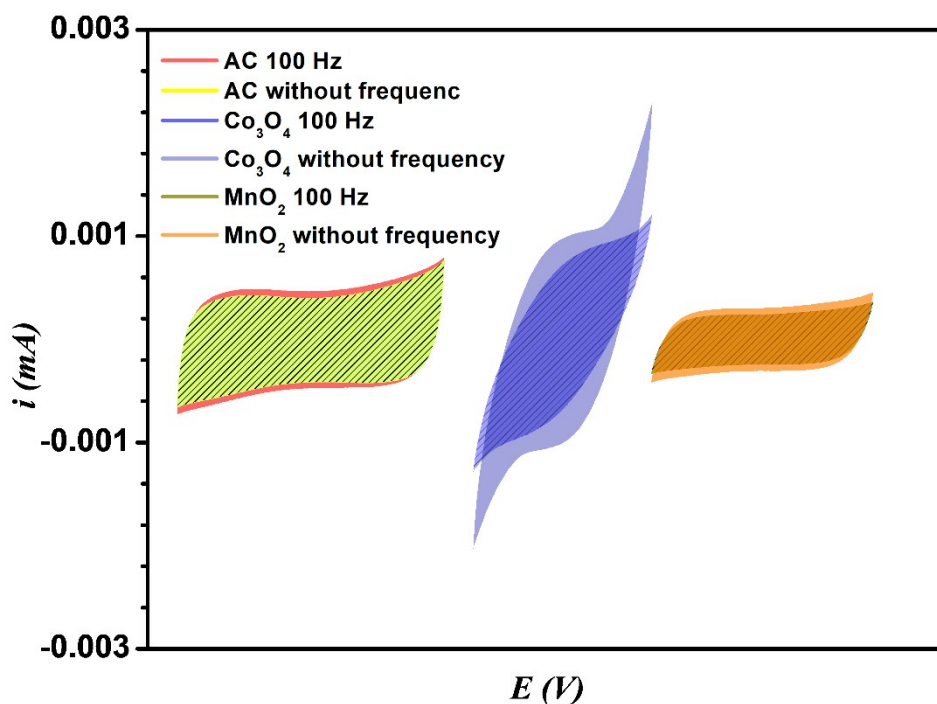

Fig. S11. Comparative CV profiles at  $10 \text{ mV s}^{-1}$  for the three materials: in absence and presence 100 Hz external frequency.

### Tables

Table S1. Specific capacitance values for all material in three electrode configuration at  $2 \text{ A g}^{-1}$  in variable frequencies.

| Material                       | Voltage window | Specific capacitance ( $\text{F g}^{-1}$ ) |
|--------------------------------|----------------|--------------------------------------------|
| Activated carbon               | -1 to 0 V      | 115                                        |
| Co <sub>3</sub> O <sub>4</sub> | -0.6 to 0.3 V  | 178                                        |
| MnO <sub>2</sub>               | -0.2 to 0.6 V  | 133                                        |
